# Supplementary material for: Patterns, perceptions, and perceived barriers to physical activity in adult cancer survivors
Source: Springer Nature journal article supplement (doi:10.1007/s00520-018-4239-5), 2018-05-28
Supplement: MOESM1 [file 15797400]

| **Variable** | **Comparison** | **Univariable Analysis** | | **Multivariable Analysis** | |
| --- | --- | --- | --- | --- | --- |
| **OR (95% CI)** | **P Value** | **aOR (95% CI)** | **P Value** |
| Age at Diagnosis | Per 1 Year Increase | 1.00 (0.98-1.02) | 0.91 |  |  |
| Gender | Male vs Female | 1.20 (0.74-1.96) | 0.45 |  |  |
| Language Spoken at Home | English vs Non-English | 1.12 (0.44-2.83) | 0.81 |  |  |
| Employment Status | Employed/Full Time Student vs Unemployed/Equiv | 1.91 (1.16-3.15) | 0.01 |  |  |
| Employment Type | White Collar vs Blue Collar | 1.34 (0.76-2.39) | 0.31 |  |  |
| Ethnicity | Caucasian vs Non-Caucasian | 2.27 (1.03-5.05) | 0.04 |  |  |
| Marital Status | Single/Living As vs Married | 1.10 (0.65-1.86) | 0.72 |  |  |
| Education | University/College/Profession Studies Completed vs Other | 1.29 (0.74-2.26) | 0.37 |  |  |
| Annual Household Income | Greater than 100k vs Less | 1.15 (0.67-1.99) | 0.61 |  |  |
| Self-Rated Health at Follow-Up | Very Good/Excellent vs Poor/Fair/Good | 2.98 (1.79-4.95) | <0.001 |  |  |
| Minutes of Moderate to Vigorous Exercise at Baseline | Per 30 Minute Increase | 1.06 (1.01-1.11) | 0.01 | 1.08 (1.03-1.13) | 0.003 |
| Follow-up Time | Per 1 Month Increase | 1.01 (1.00-1.02) | 0.009 |  |  |
| ECOG at Follow-Up | 0 vs 1+ | 5.00 (1.47-8.33) | <0.001 | 5.56 (3.23-10.00) | <0.001 |
| Stage | Metastatic vs Localized | 0.43 (0.17-1.07) | 0.07 |  |  |
| Hematologic vs Localized | 0.51 (0.27-0.95) | 0.04 |  |  |
| Initial Treatment Intent | Palliative vs Curative | 0.10 (0.01-0.83) | 0.03 |  |  |
| Follow-up Treatment Intent | Palliative vs Curative | 0.22 (0.08-0.61) | 0.003 | 0.20 (0.07-0.57) | 0.003 |
| Surgery | Yes vs No | 1.60 (0.96-2.67) | 0.07 |  |  |
| Radiation | Yes vs No | 1.21 (0.74-2.00) | 0.45 |  |  |
| Systemic Therapy | Yes vs No | 0.56 (0.33-0.94) | 0.03 |  |  |

**Supplementary Table 1.** Summary of univariate and multivariate association analysis results of socio-demographic and clinico-pathological covariates with maintaining meeting MVPA guidelines from baseline to follow-up among patients who were meeting MVPA guidelines at diagnosis.

| **Variable** | **Comparison** | **Univariable Analysis** | | **Multivariable Analysis** | |
| --- | --- | --- | --- | --- | --- |
| **OR (95% CI)** | **P Value** | **aOR (95% CI)** | **P Value** |
| Age at Diagnosis | Per 1 Year Increase | 0.96 (0.95-0.98) | 9.1E-5 | 0.97 (0.95-0.99) | 0.003 |
| Gender | Male vs Female | 0.77 (0.46-1.29) | 0.33 |  |  |
| Language Spoken at Home | English vs Non-English | 0.46 (0.23-0.93) | 0.03 | 0.39 (0.18-0.83) | 0.01 |
| Employment Status | Employed/Full Time Student vs Unemployed/Equiv | 1.51 (0.90-2.52) | 0.12 |  |  |
| Employment Type | White Collar vs Blue Collar | 1.72 (0.89-3.33) | 0.11 |  |  |
| Ethnicity | Caucasian vs Non-Caucasian | 0.98 (0.53-1.81) | 0.96 |  |  |
| Marital Status | Single/Living As vs Married | 1.14 (0.65-1.98) | 0.65 |  |  |
| Education | University/College/Profession Studies Completed vs Other | 2.83 (1.55-5.16) | <0.001 | 2.34 (1.25-4.37) | 0.008 |
| Annual Household Income | Greater than 100k vs Less | 1.44 (0.79-2.63) | 0.23 |  |  |
| Self-Rated Health at Follow-Up | Very Good/Excellent vs Poor/Fair/Good | 3.41 (2.03-5.73) | <0.001 | 3.52 (2.02-6.14) | <0.001 |
| Minutes of Moderate to Vigorous Exercise at Baseline | Per 30 Minute Increase | 1.26 (1.08-1.47) | 0.003 |  |  |
| Follow-up Time | Per 1 Month Increase | 1.01 (1.00-1.02) | 0.01 |  |  |
| ECOG at Follow-Up | 0 vs 1+ | 2.54 (1.49-4.32) | 0.001 |  |  |
| Stage | Metastatic vs Localized | 1.05 (0.42-2.58) | 0.92 |  |  |
| Hematologic vs Localized | 1.51 (0.82-2.79) | 0.19 |  |  |
| Initial Treatment Intent | Palliative vs Curative | 1.82 (0.66-4.99) | 0.25 |  |  |
| Follow-up Treatment Intent | Palliative vs Curative | 1.03 (0.49-2.17) | 0.94 |  |  |
| Surgery | Yes vs No | 0.87 (0.52-1.45) | 0.59 |  |  |
| Radiation | Yes vs No | 0.57 (0.34-0.95) | 0.03 |  |  |
| Systemic Therapy | Yes vs No | 1.30 (0.77-2.20) | 0.32 |  |  |

**Supplementary Table 2.** Summary of univariate and multivariate association analysis results of socio-demographic and clinico-pathological covariates with improving to MVPA guidelines either during treatment or at follow-up among patients who were not meeting MVPA guidelines at baseline.

| **Barrier** | **All Patients (n=489)** | **Not Meeting MVPA Guidelines at Baseline (n=307)** | **Not Meeting MVPA Now (n=299)** | **Not Meeting MVPA including those on Treatment (n=374)** |
| --- | --- | --- | --- | --- |
| Too tired. | 41% | 42% | 43% | 46% |
| Too busy. | 30% | 29% | 29% | 28% |
| Don’t have enough motivation. | 30% | 37% | 36% | 36% |
| Don’t like to exercise in bad weather. | 26% | 30% | 28% | 28% |
| Have responsibilities at home. | 25% | 24% | 24% | 23% |
| Don’t enjoy doing it. | 19% | 24% | 22% | 22% |
| Too ill to exercise. | 14% | 12% | 13% | 16% |
| Not sure what to do. | 14% | 18% | 15% | 16% |
| Worried about getting injured. | 13% | 15% | 13% | 14% |
| Have no one to exercise with. | 11% | 13% | 12% | 13% |
| Have no access to gym or exercise equipment. | 10% | 11% | 11% | 12% |
| Don’t want to get sore. | 10% | 12% | 10% | 11% |
| Don’t like to sweat. | 10% | 11% | 12% | 11% |
| Have no one to help or support me. | 9% | 11% | 9% | 11% |
| Feel self-conscious when I exercise. | 9% | 12% | 13% | 11% |
| Have nowhere to do it. | 5% | 6% | 7% | 7% |
| Other Comorbidities | 4% | 4% | 5% | 5% |

**Supplementary Table 3.** Summary of patient responses to patient perceived barriers to undergoing routine physical activity separated based on whether patients were meeting MVPA guidelines at different time points.
